# Supplementary material
Source: publisher figshare collection journal article supplement (https://acs.figshare.com/ndownloader/files/29051576)
Supplement: Supplementary file 1 [file 29051576]

# Supporting Information

## Studying and Utilizing Traditional Technologies: Microstructure and Formation

### Mechanism of $\epsilon$ -Fe<sub>2</sub>O<sub>3</sub> on Traditional Japanese Bizen Stoneware

Yoshihiro Kusano,<sup>1\*</sup> Hiroyuki Nakata,<sup>1</sup> Zeliang Peng,<sup>1</sup> Ryosuke S. S. Maki,<sup>1</sup> Tomoyuki Ogawa<sup>2</sup> and Minoru Fukuhara<sup>1</sup>

<sup>1</sup> Department of Applied Chemistry and Biotechnology, Okayama University of Science, 1-1 Ridai-cho, Kita-ku, Okayama 700-0005, Japan

<sup>2</sup> Graduate School of Engineering, Tohoku University, 6-6-05 Aobayama, Sendai 980-8579, Japan

\*To whom correspondence should be addressed. Tel & Fax: +81 86 256 9827, E-mail: kusano@dac.ous.ac.jp

Table S1. Chemical composition of the ash obtained from pine firewood heated at 600 °C in air.

| C    | Na <sub>2</sub> O | MgO  | Al <sub>2</sub> O <sub>3</sub> | SiO <sub>2</sub> | K <sub>2</sub> O | CaO  | MnO  | Fe <sub>2</sub> O <sub>3</sub> | SrO  | Total |
|------|-------------------|------|--------------------------------|------------------|------------------|------|------|--------------------------------|------|-------|
| 7.70 | 0.72              | 7.80 | 0.99                           | 0.75             | 14.0             | 54.0 | 8.60 | 0.29                           | 0.80 | 95.7  |

The sample was analyzed by X-ray fluorescence analysis (XRF). Unit of numbers in the Table S1 is weight percent (wt %).

Table S2. Chemical composition of the ash obtained from pine firewood heated at 1250 °C in air.

| C    | Na <sub>2</sub> O | MgO  | Al <sub>2</sub> O <sub>3</sub> | SiO <sub>2</sub> | K <sub>2</sub> O | CaO  | MnO  | Fe <sub>2</sub> O <sub>3</sub> | SrO  | Total |
|------|-------------------|------|--------------------------------|------------------|------------------|------|------|--------------------------------|------|-------|
| 2.60 | –                 | 10.0 | 3.00                           | 1.60             | –                | 65.0 | 12.0 | 1.00                           | 1.10 | 96.3  |

The sample was analyzed by XRF. Unit of numbers in the Table S2 is weight percent (wt %).

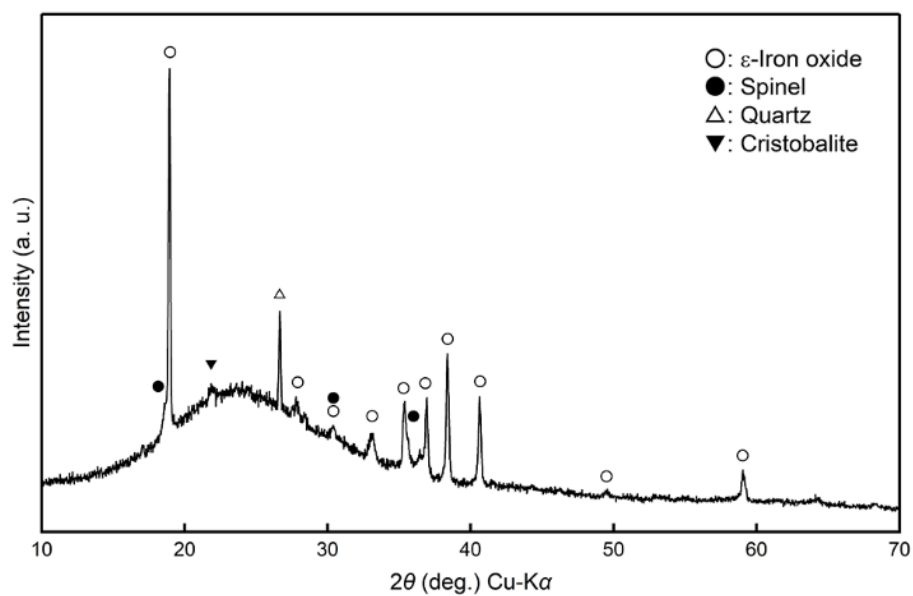

Figure S1. XRD pattern acquired from the surface of a brownish colored Bizen fragment fired in a firewood kiln.

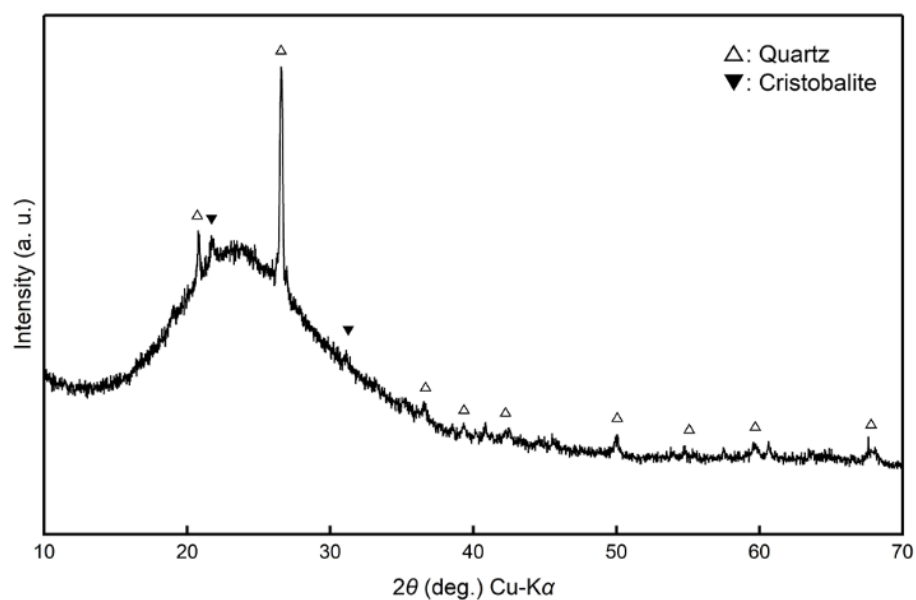

Figure S2. XRD pattern acquired from a reproduced sample surface heated with  $\text{K}_2\text{CO}_3$  to 1230 °C in air, held at the same temperature for 5 h under a mixture of 10 vol% CO gas and 90 vol% Ar gas, and then cooled to room temperature.

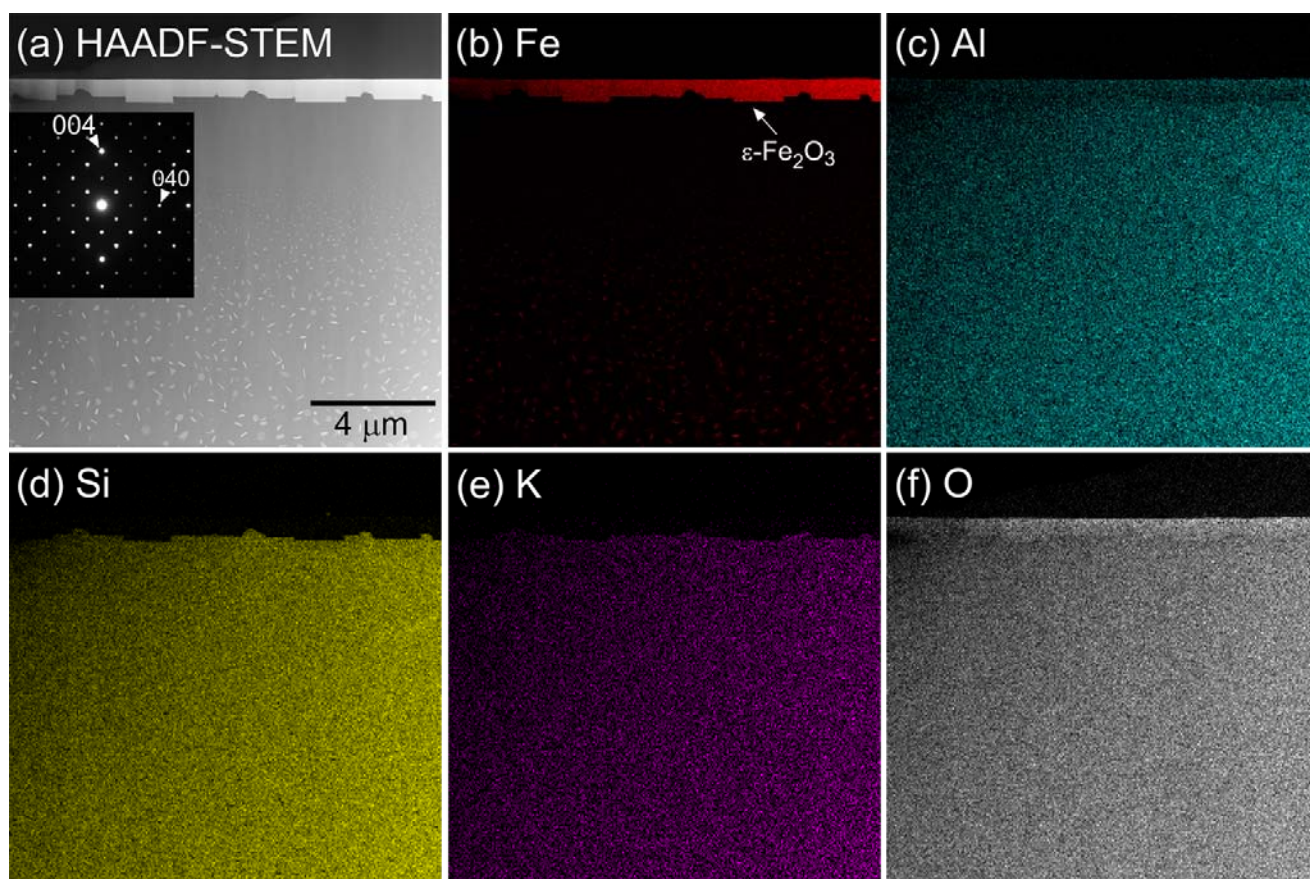

Figure S3. (a) Cross-sectional HAADF-STEM image of the surface of a reproduced brownish Bizen sample and (b) Fe, (c) Al, (d) Si, (e) K and (f) O EDS maps obtained from the same sample.
